# Supplementary material for: Kinetic Extraction of Fucoxanthin from Undaria pinnatifida Using Ethanol as a Solvent
Source: MDPI journal article supplement (doi:10.3390/md21070414), 2023-07-21
Supplement: s1 [file s1]

## Supplementary Material

**Table S1.** *MAE*, *RMSE* and *RMSE-MAE* values for each response (*Y*) at different *T* and *S*.

| VARIABLES       |                  | Y <sub>1</sub> (µg Fx/g AS) |             |                 | Y <sub>2</sub> (mg E/g AS) |             |                 | Y <sub>3</sub> (mg Fx/g AS) |             |                 |
|-----------------|------------------|-----------------------------|-------------|-----------------|----------------------------|-------------|-----------------|-----------------------------|-------------|-----------------|
| <i>S</i><br>(%) | <i>T</i><br>(°C) | <i>MAE</i>                  | <i>RMSE</i> | <i>RMSE-MAE</i> | <i>MAE</i>                 | <i>RMSE</i> | <i>RMSE-MAE</i> | <i>MAE</i>                  | <i>RMSE</i> | <i>RMSE-MAE</i> |
| <b>50</b>       | 5                | 89.5                        | 122         | 32.5            | 15.3                       | 19.5        | 4.3             | 0.3                         | 0.4         | 0.1             |
|                 | 25               | 153.6                       | 194.4       | 40.8            | 10.5                       | 14.9        | 4.4             | 0.6                         | 0.9         | 0.3             |
|                 | 45               | 50.8                        | 59.5        | 8.8             | 16.4                       | 21.7        | 5.3             | 0.4                         | 0.5         | 0.1             |
|                 | 65               | 228                         | 262.2       | 34.2            | 8.5                        | 13.1        | 4.6             | 0.6                         | 0.7         | 0.1             |
|                 | 85               | 173.4                       | 289         | 115.6           | 6.5                        | 15.9        | 9.3             | 0.6                         | 1.4         | 0.8             |
| <b>60</b>       | 5                | 390.8                       | 445.1       | 54.3            | 15.1                       | 17.6        | 2.4             | 1.4                         | 1.6         | 0.2             |
|                 | 25               | 179.6                       | 206.7       | 27.1            | 10.7                       | 14.5        | 3.8             | 0.5                         | 0.5         | 0.1             |
|                 | 45               | 215.9                       | 257.3       | 41.4            | 14.3                       | 20.6        | 6.3             | 0.6                         | 0.7         | 0.1             |
|                 | 65               | 391.2                       | 501.4       | 110.2           | 9.5                        | 12.5        | 3.0             | 0.3                         | 0.6         | 0.3             |
|                 | 85               | 320.1                       | 411         | 90.9            | 6.9                        | 9.4         | 2.5             | 2.1                         | 2.6         | 0.5             |
| <b>70</b>       | 5                | 935.2                       | 1039.2      | 104.0           | 17.7                       | 22.0        | 4.3             | 1.9                         | 2.2         | 0.3             |
|                 | 25               | 157.9                       | 217.2       | 59.3            | 4.6                        | 6.5         | 1.9             | 0.3                         | 0.4         | 0.1             |
|                 | 45               | 166.4                       | 198.2       | 31.8            | 19.5                       | 27.4        | 7.9             | 0.5                         | 0.6         | 0.1             |
|                 | 65               | 302.3                       | 418.8       | 116.5           | 9.0                        | 11.2        | 2.2             | 0.7                         | 1.0         | 0.3             |
|                 | 85               | 292.2                       | 384.6       | 92.4            | 9.5                        | 13.9        | 4.4             | 2.1                         | 2.7         | 0.7             |
| <b>80</b>       | 5                | 726                         | 838.2       | 112.2           | 18.0                       | 23.9        | 5.9             | 2.3                         | 2.6         | 0.4             |
|                 | 25               | 274.9                       | 368.5       | 93.6            | 6.9                        | 9.4         | 2.5             | 0.9                         | 1.1         | 0.2             |
|                 | 45               | 283.5                       | 323.1       | 39.6            | 10.1                       | 12.4        | 2.3             | 0.7                         | 0.8         | 0.2             |
|                 | 65               | 135.8                       | 189.6       | 53.8            | 17.7                       | 23.8        | 6.1             | 0.9                         | 1.2         | 0.3             |
|                 | 85               | 361.9                       | 482.7       | 120.9           | 11.2                       | 16.3        | 5.2             | 2.4                         | 3.0         | 0.7             |
| <b>90</b>       | 5                | 427.4                       | 592.9       | 165.4           | 18.2                       | 22.4        | 4.3             | 2.4                         | 2.9         | 0.4             |
|                 | 25               | 405.3                       | 469.6       | 64.3            | 23.2                       | 27.4        | 4.2             | 1.5                         | 1.9         | 0.4             |
|                 | 45               | 401.8                       | 461.3       | 59.6            | 45.5                       | 54.4        | 8.9             | 0.9                         | 1.2         | 0.2             |
|                 | 65               | 267.9                       | 300.2       | 32.3            | 20.7                       | 23.9        | 3.2             | 0.8                         | 1.1         | 0.3             |
|                 | 85               | 311.1                       | 392.5       | 81.4            | 18.5                       | 24.0        | 5.5             | 2.1                         | 3.1         | 0.9             |
| <b>100</b>      | 5                | 511.9                       | 748.2       | 236.4           | 10.2                       | 12.4        | 2.2             | 5.7                         | 7.1         | 1.3             |
|                 | 25               | 220.3                       | 295.2       | 75.0            | 14.6                       | 17.5        | 2.9             | 5.5                         | 7.7         | 2.1             |
|                 | 45               | 384                         | 443.1       | 59.1            | 7.7                        | 10.0        | 2.2             | 3.0                         | 3.7         | 0.7             |
|                 | 65               | 242.3                       | 326.1       | 83.8            | 10.0                       | 12.7        | 2.7             | 4.6                         | 5.9         | 1.3             |
|                 | 85               | 344.2                       | 429.7       | 85.5            | 12.1                       | 17.5        | 5.4             | 4.7                         | 6.7         | 2.0             |

## Absorbance spectra

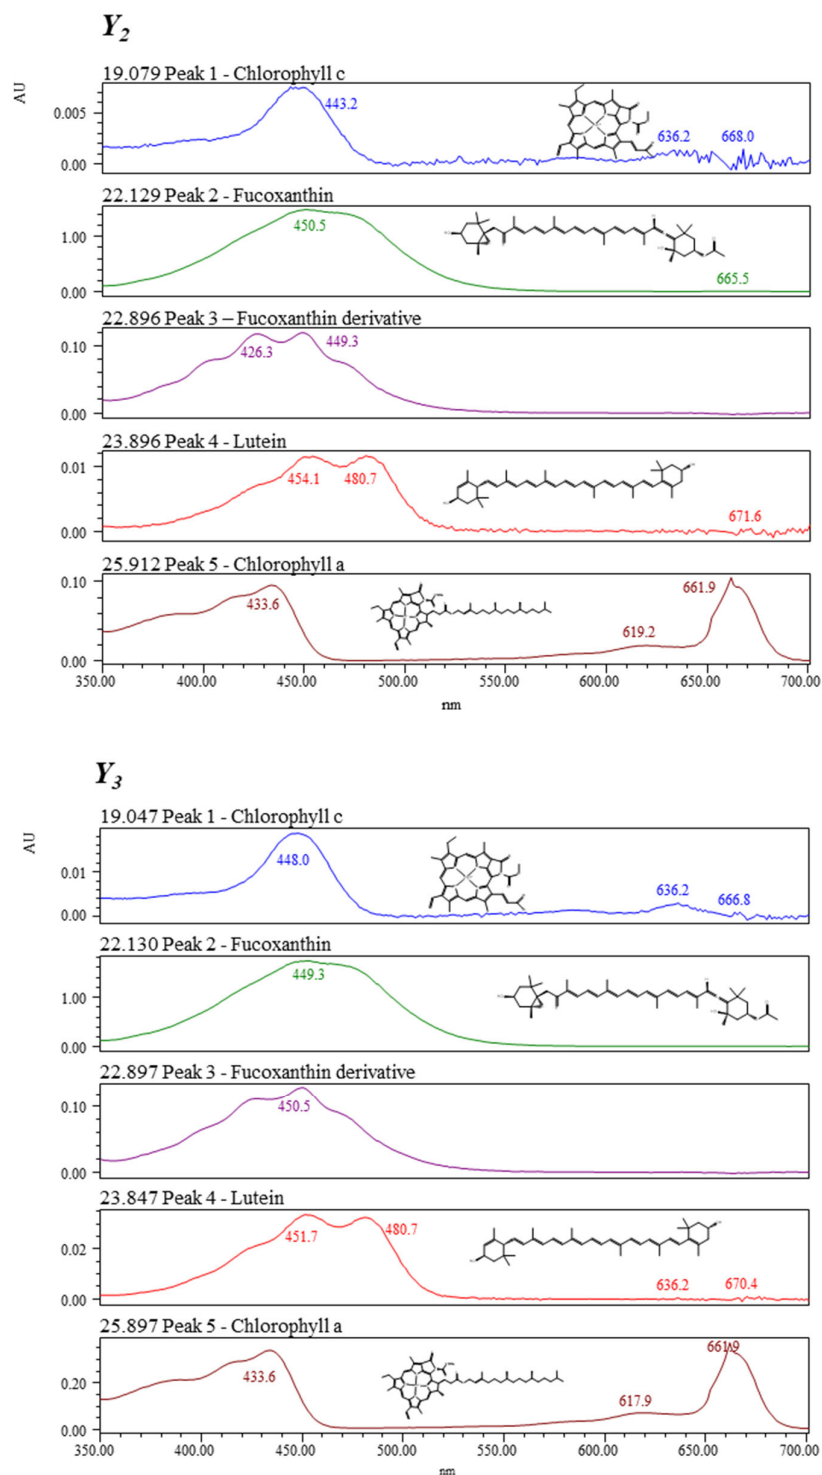

**Figure S1.** Absorption spectra for the five identified pigments found in  $Y_2$  and  $Y_3$  using HPLC-DAD.
